# Supplementary material for: Biophysics and vegetation cover change: a process-based evaluation framework for confronting land surface models with satellite observations
Source: Copernicus journal article supplement (doi:10.5194/essd-10-1265-2018), 2018-07-13
Supplement: Supplementary file 1 [file essd-10-1265-2018-supplement.zip]

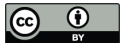

## *Supplement of*

# **Biophysics and vegetation cover change: a process-based evaluation framework for confronting land surface models with satellite observations**

**Gregory Duveiller et al.**

*Correspondence to:* Gregory Duveiller ([gregory.duveiller@ec.europa.eu](mailto:gregory.duveiller@ec.europa.eu))

- [essd-10-1265-2018-supplement-title-page.pdf](#)
- SI
  - [AgreementSummary\\_\\_\\_DecTr2Crops.png](#)
  - [AgreementSummary\\_\\_\\_DecTr2Grass.png](#)
  - [AgreementSummary\\_\\_\\_DecTr2NedTr.png](#)
  - [AgreementSummary\\_\\_\\_DecTr2Shrub.png](#)
  - [AgreementSummary\\_\\_\\_EvgTr2Crops.png](#)
  - [AgreementSummary\\_\\_\\_EvgTr2DecTr.png](#)
  - [AgreementSummary\\_\\_\\_EvgTr2Grass.png](#)
  - [AgreementSummary\\_\\_\\_EvgTr2NedTr.png](#)
  - [AgreementSummary\\_\\_\\_EvgTr2Shrub.png](#)
  - [AgreementSummary\\_\\_\\_Grass2Crops.png](#)
  - [AgreementSummary\\_\\_\\_NedTr2Crops.png](#)
  - [AgreementSummary\\_\\_\\_NedTr2Grass.png](#)
  - [AgreementSummary\\_\\_\\_NedTr2Shrub.png](#)
  - [AgreementSummary\\_\\_\\_Shrub2Crops.png](#)
  - [AgreementSummary\\_\\_\\_Shrub2Grass.png](#)

The copyright of individual parts of the supplement might differ from the CC BY 4.0 License.
